# Supplementary material for: High-dose vitamin D3 supplementation in relapsing-remitting multiple sclerosis: a randomised clinical trial
Source: PubMed Central journal article supplement — eClinicalMedicine. 2023 Apr 13;59:101957. doi: 10.1016/j.eclinm.2023.101957 (PMC10130605; doi:10.1016/j.eclinm.2023.101957), 2023-04-13
Supplement: mmc1.pdf [file mmc1.pdf]

Online-Only Supplemental Tables

eTable 1. Secondary Clinical Outcomes: Additional Relapse Outcomes

eTable 2. Secondary Clinical Outcomes: MSFC (and components), LCLA and FAMS

eTable 3. Secondary Imaging Outcomes: Volumetric Outcomes

eTable 4. Secondary Imaging Outcomes: Lesion Count Outcomes

eTable 1. Secondary Clinical Outcomes: Additional Relapse Outcomes

| Outcome                                                          | Vitamin D <sub>3</sub><br>600 IU/day<br>(n=82) | Vitamin D <sub>3</sub><br>5000 IU/day<br>(n=83) | Hazard Ratio<br>(HR; 95% CI)      | p-value |
|------------------------------------------------------------------|------------------------------------------------|-------------------------------------------------|-----------------------------------|---------|
| Proportion with Confirmed or Probable Relapse at 96 Weeks        | 0.43<br>(0.31, 0.53)                           | 0.49<br>(0.37, 0.59)                            | 1.21<br>(0.75, 1.94)              | 0.43    |
| Annualized Relapse Rate (confirmed relapses only; 95% CI)        | 0.20<br>(0.11, 0.35)                           | 0.34<br>(0.20, 0.56)                            | 1.70<br>(0.97, 2.97)              | 0.06    |
| Annualized Relapse Rate (confirmed or probable relapses; 95% CI) | 0.28<br>(0.17, 0.46)                           | 0.44<br>(0.28, 0.70)                            | 1.58<br>(0.98, 2.56)              | 0.06    |
| Rate of Confirmed Relapses Requiring Steroids                    | 0.15<br>(0.08, 0.30)                           | 0.28<br>(0.15, 0.51)                            | 1.80 <sup>a</sup><br>(0.94, 3.35) | 0.07    |

Abbreviation: CI (Confidence Interval)

<sup>a</sup> Relative Risk (RR) and 95% CI

eTable 2. Secondary Clinical Outcomes: MSFC (and components), LCLA and FAMS

| Outcome                                                                | Vitamin D <sub>3</sub><br>600 IU/day<br>(n=82) | Vitamin D <sub>3</sub><br>5000 IU/day<br>(n=83) | Mean Difference in Outcome Changes between Dose Groups (95% CI) | p-value |
|------------------------------------------------------------------------|------------------------------------------------|-------------------------------------------------|-----------------------------------------------------------------|---------|
| Change in MSFC Z-score, mean (95% CI)                                  | 0.05<br>(0.02, 0.079)                          | 0.022<br>(-0.006, 0.050)                        | -0.03<br>(-0.07, 0.01)                                          | 0.16    |
| Change in Timed 25-foot walk test <sup>a</sup> geometric mean (95% CI) | 1.02<br>(1.00, 1.04)                           | 1.01<br>(0.99, 1.03)                            | 0.99 <sup>a</sup><br>(0.96, 1.01)                               | 0.35    |
| Change in 9-hole peg test <sup>a</sup> geometric mean (95% CI)         | 0.98<br>(0.97, 0.99)                           | 1.00<br>(0.99, 1.01)                            | 1.02 <sup>a</sup><br>(1.00, 1.03)                               | 0.01    |
| Change in PASAT-3 second test score, mean (95% CI)                     | 1.15<br>(0.53, 1.76)                           | 0.78<br>(0.16, 1.41)                            | 1.02<br>(-1.29, 0.41)                                           | 0.41    |
| Change in binocular 2.5% LCLA, mean (95% CI)                           | 0.82<br>(-0.08, 1.71)                          | 1.09<br>(0.20, 1.99)                            | 0.28<br>(-0.99, 1.54)                                           | 0.67    |
| Change in overall FAMS score, mean (95% CI)                            | -0.78<br>(-2.38, 0.82)                         | -2.29<br>(-3.89, -0.70)                         | -1.51<br>(-3.77, 0.75)                                          | 0.19    |

Abbreviations: MSFC (Multiple Sclerosis Functional Composite); PASAT (Paced Auditory Serial Addition Test); LCLA (low-contrast letter acuity); FAMS (Functional Assessment of Multiple Sclerosis); CI (Confidence Interval)

<sup>a</sup> Geometric mean ratio and 95% CI

eTable 3. Secondary Imaging Outcomes: Volumetric Outcomes

| Volumetric Outcome                                               | Vitamin D <sub>3</sub><br>600 IU/day<br>(n=78) | Vitamin D <sub>3</sub><br>5000 IU/day<br>(n=82) | Mean Difference<br>in Outcome<br>Changes between<br>Dose Groups<br>(95% CI) | p-value |
|------------------------------------------------------------------|------------------------------------------------|-------------------------------------------------|-----------------------------------------------------------------------------|---------|
| Change in normalized brain parenchymal volume (%), mean (95% CI) | -0.26 (-0.75, 0.23)                            | -0.78 (-1.25, -0.31)                            | -0.52 (-1.20, 0.16)                                                         | 0.13    |
| Change in normalized grey matter volume (%), mean (95% CI)       | -0.12 (-0.71, 0.47)                            | -0.82 (-1.39, -0.26)                            | -0.70 (-1.52, 0.12)                                                         | 0.09    |
| Change in T2 lesion volume geometric mean (95% CI)               | 1.03 (0.98, 1.08)                              | 1.09 (1.04, 1.15)                               | 1.06 <sup>a</sup> (0.99, 1.14)                                              | 0.12    |

Abbreviation: CI (Confidence Interval)

<sup>a</sup> Geometric mean ratio and 95% CI

eTable 4. Secondary Imaging Outcomes: Lesion Count Outcomes

| Lesion Count Outcome                                               | Vitamin D <sub>3</sub><br>600 IU/day<br>(n=78) | Vitamin D <sub>3</sub><br>5000 IU/day<br>(n=82) | Rate Ratio<br>Comparing Dose<br>Groups (95% CI) | p-value |
|--------------------------------------------------------------------|------------------------------------------------|-------------------------------------------------|-------------------------------------------------|---------|
| Rate of new or enlarged T2 lesions, mean (95% CI)                  | 1.96 (1.17, 3.30)                              | 2.89 (1.79, 4.65)                               | 1.47 (0.88, 2.46)                               | 0.14    |
| Rate of gadolinium positive (Gd+) enhancing lesions, mean (95% CI) | 0.32 (0.10, 0.98)                              | 0.22 (0.08, 0.62)                               | 0.68 (0.22, 2.10)                               | 0.48    |
| Rate of new/enlarged T2 or Gd+ enhancing lesions, mean (95% CI)    | 2.25 (1.31, 3.84)                              | 3.17 (1.93, 5.19)                               | 1.41 (0.83, 2.39)                               | 0.20    |

Abbreviation: CI (Confidence Interval)
